# Supplementary material for: Cytokine Signatures in Mucocutaneous and Ocular Behçet’s Disease
Source: Front Immunol. 2017 Feb 27;8:200. doi: 10.3389/fimmu.2017.00200 (PMC5327443; doi:10.3389/fimmu.2017.00200)
Supplement: Supplementary file 1 [file Table_1.XLSX]

## Sheet: Supplementary Table 1
Supplementary Table 1. Correlation coefficients among serum cytokines analysed in Healthy Controls and patients affected by Behçet’s disease. Correlations analysis were performed using Spearman’s correlation (two-tailed p-value) as well as Pearson’s correlation test when required. Significant correlation (p value <0,05) were reported in bold.
Healthy Controls	APRIL/TNFS13		BAFF/ TNFSF 13B		sCD30/TNFRSF8		sCD163		Chitinase 3-like 1		gp 130/sIL-6Rb		IFNb		sIL-6Ra		IL-11		IL-19		IL-20		IL-26		IL-35		Pentraxin-3		sTNF-R1		sTNF-R2		TSLP		TWEAK/TNFSF-12
	r	p	r	p	r	p	r	p	r	p	r	p	r	p	r	p	r	p	r	p	r	p	r	p	r	p	r	p	r	p	r	p	r	p	r	p
APRIL/TNFS13			-0.239	0.225694	0.097	0.48125	-0.114	0.447222	-0.383	0.0729167	0.058	0.565278	-0.098	0.568056	0.0854167	0.428472	0.3125	0.0736111	0.0930556	0.404861	0.363889	0.021	-0.231	0.169444	-0.142	0.389583	-0.175	0.26875	0.294444	0.07	-0.182	0.316667	-0.238	0.286806	-0.292	0.156944
BAFF/TNFSF 13B	-0.239	0.225694			-0.081	0.515972	0.240278	0.102083	0.148611	0.263889	0.0694444	0.475	0.046	0.634028	-0.01	0.672222	-0.074	0.556944	-0.074	0.530556	-0.192	0.299306	0.421528	0.126389	-0.034	0.618056	0.136111	0.193056	-0.028	0.631944	0.26875	0.0701389	-0.142	0.435417	0.147222	0.265972
sCD30/TNFRSF8	0.097	0.48125	-0.081	0.515972			-0.051	0.58125	0.14375	0.275	-0.339	0.107639	-0.023	0.663889	0.186111	0.186111	-0.118	0.477083	0.11875	0.335417	-0.35	0.0986111	-0.627	0.091	-0.294	0.153472	0.209722	0.360417	0.107639	0.365278	0.25625	0.0833333	-0.375	0.129861	0.172917	0.211806
sCD163	-0.114	0.447222	0.240278	0.102083	-0.051	0.58125			0.097	0.48125	0.272222	0.097	0.290972	0.209028	-0.003	0.686806	0.151389	0.315278	-0.216	0.259722	0.115278	0.345139	-0.169	0.685417	0.0972222	0.394444	0.012	0.322222	0.211806	0.141667	0.352083	0.027	0.005	0.685417	0.086	0.504861
Chitinase 3-like 1	-0.383	0.0729167	0.148611	0.263889	0.14375	0.275	0.097	0.48125			0.277778	0.09	0.269444	0.238194	0.115278	0.345139	-0.242	0.280556	0.061	0.559722	-0.289	0.159028	-0.264	0.425	0.109722	0.360417	0.379167	0.016	-0.133	0.407639	0.334722	0.037	-0.023	0.651389	0.265972	0.0729167
gp 130/sIL-6Rb	0.058	0.565278	0.0694444	0.475	-0.339	0.107639	0.272222	0.097	0.277778	0.09			0.320833	0.173611	-0.122	0.429861	-0.006	0.683333	-0.342	0.104861	0.308333	0.057	0.038	0.599306	0.061	0.559028	0.085	0.120139	0.0916667	0.410417	0.170833	0.215278	-0.019	0.658333	-0.123	0.427778
IFNb	-0.098	0.568056	0.046	0.634028	-0.023	0.663889	0.290972	0.209028	0.269444	0.238194	0.320833	0.173611			-0.087	0.581944	-0.451	0.25625	-0.275	0.354167	0.291667	0.208333	0.280556	0.555556	0.207639	0.327778	0.410417	0.177083	0.197222	0.34375	0.259028	0.251389	-0.008	0.688889	0.122222	0.470139
sIL-6Ra	0.0854167	0.428472	-0.01	0.672222	0.186111	0.186111	-0.003	0.686806	0.115278	0.345139	-0.122	0.429861	-0.087	0.581944			0.104167	0.423611	0.0805556	0.442361	0.099	0.476389	-0.225	0.306944	0.027	0.632639	0.195139	0.0861111	0.115972	0.343056	0.117361	0.339583	-0.108	0.494444	-0.008	0.677083
IL-11	0.3125	0.0736111	-0.074	0.556944	-0.118	0.477083	0.151389	0.315278	-0.242	0.280556	-0.006	0.683333	-0.451	0.25625	0.104167	0.423611			-0.306	0.199306	0.215972	0.19375	-0.026	0.578472	-0.28	0.230556	-0.475	0.0965278	0.288194	0.0972222	-0.311	0.19375	0.086	0.549306	-0.509	0.063
IL-19	0.0930556	0.404861	-0.074	0.530556	0.11875	0.335417	-0.216	0.259722	0.061	0.559722	-0.342	0.104861	-0.275	0.354167	0.0805556	0.442361	-0.306	0.199306			-0.139	0.395833	-0.205	0.1125	0.382639	0.014	0.204861	0.486111	-0.087	0.501389	0.0805556	0.443056	-0.158	0.410417	0.495833	0.001
IL-20	0.363889	0.021	-0.192	0.299306	-0.35	0.0986111	0.115278	0.345139	-0.289	0.159028	0.308333	0.057	0.291667	0.208333	0.099	0.476389	0.215972	0.19375	-0.139	0.395833			-0.242	0.315278	-0.019	0.650694	-0.246	0.40625	0.343056	0.031	-0.166	0.345139	0.033	0.632639	-0.472	0.042
IL-26	-0.231	0.169444	0.421528	0.126389	-0.627	0.091	-0.169	0.685417	-0.264	0.425	0.038	0.599306	0.280556	0.555556	-0.225	0.306944	-0.026	0.578472	-0.205	0.1125	-0.242	0.315278			0.320833	0.240278	-0.154	0.397917	-0.496	0.045	-0.359	0.345833	-0.01	0.690278	0.093	0.666667
IL-35	-0.142	0.389583	-0.034	0.618056	-0.294	0.153472	0.0972222	0.394444	0.109722	0.360417	0.061	0.559028	0.207639	0.327778	0.027	0.632639	-0.28	0.230556	0.382639	0.014	-0.019	0.650694	0.320833	0.240278			0.1625	0.389583	-0.257	0.2	0.0756944	0.456944	0.029	0.640278	0.448611	0.003
Pentraxin-3	-0.175	0.26875	0.136111	0.193056	0.209722	0.360417	0.012	0.322222	0.379167	0.016	0.085	0.120139	0.410417	0.177083	0.195139	0.0861111	-0.475	0.0965278	0.204861	0.486111	-0.246	0.40625	-0.154	0.397917	0.1625	0.389583			-0.08	0.493056	0.449306	0.005	-0.103	0.529167	0.444444	0.103472
sTNF-R1	0.294444	0.07	-0.028	0.631944	0.107639	0.365278	0.211806	0.141667	-0.133	0.407639	0.0916667	0.410417	0.197222	0.34375	0.115972	0.343056	0.288194	0.0972222	-0.087	0.501389	0.343056	0.031	-0.496	0.045	-0.257	0.2	-0.08	0.493056			0.179861	0.197222	0.0895833	0.458333	-0.214	0.263194
sTNF-R2	-0.182	0.316667	0.26875	0.0701389	0.25625	0.0833333	0.352083	0.027	0.334722	0.037	0.170833	0.215278	0.259028	0.251389	0.117361	0.339583	-0.311	0.19375	0.0805556	0.443056	-0.166	0.345139	-0.359	0.345833	0.0756944	0.456944	0.449306	0.005	0.179861	0.197222			0.0694444	0.510417	0.350694	0.027
TSLP	-0.238	0.286806	-0.142	0.435417	-0.375	0.129861	0.005	0.685417	-0.023	0.651389	-0.019	0.658333	-0.008	0.688889	-0.108	0.494444	0.086	0.549306	-0.158	0.410417	0.033	0.632639	-0.01	0.690278	0.029	0.640278	-0.103	0.529167	0.0895833	0.458333	0.0694444	0.510417			-0.267	0.247222
TWEAK/TNFSF-12	-0.292	0.156944	0.147222	0.265972	0.172917	0.211806	0.086	0.504861	0.265972	0.0729167	-0.123	0.427778	0.122222	0.470139	-0.008	0.677083	-0.509	0.063	0.495833	0.001	-0.472	0.042	0.093	0.666667	0.448611	0.003	0.444444	0.103472	-0.214	0.263194	0.350694	0.027	-0.267	0.247222
Behçet’s disease patients	APRIL/TNFS13		BAFF/ TNFSF 13B		sCD30/TNFRSF8		sCD163		Chitinase 3-like 1		gp 130/ sIL-6Rb		IFNb		sIL-6Ra		IL-11		IL-19		IL-20		IL-26		IL-35		Pentraxin-3		sTNF-R1		sTNF-R2		TSLP		TWEAK/TNFSF-12
	r	p	r	p	r	p	r	p	r	p	r	p	r	p	r	p	r	p	r	p	r	p	r	p	r	p	r	p	r	p	r	p	r	p	r	p
APRIL/TNFS13			-0.008	0.665972	-0.04	0.55	-0.124	0.285417	0.032	0.578472	-0.16	0.2	-0.167	0.275	-0.046	0.527778	0.052	0.549306	-0.068	0.452778	0.151389	0.104167	-0.228	0.23125	0.142361	0.119444	-0.054	0.5	0.052	0.509028	0.04	0.549306	0.0868056	0.311111	-0.316	0.033
BAFF/TNFSF 13B	-0.008	0.665972			0.107639	0.183333	0.263889	<0,001	0.263194	<0,001	0.269444	<0,001	0.2875	0.018	0.29375	<0,001	0.049	0.536806	0.202778	0.032	0.192361	0.045	0.087	0.463194	0.29375	<0,001	0.28125	<0,001	0.349306	<0,001	0.306944	<0,001	0.2125	0.038	0.204861	0.03
sCD30/TNFRSF8	-0.04	0.55	0.107639	0.183333			0.456944	<0,001	0.255556	0.006	0.38125	<0,001	0.269444	0.028	0.304861	<0,001	0.058	0.510417	0.136111	0.107639	0.210417	0.028	0.286111	0.033	0.322222	<0,001	0.175	0.066	0.370833	<0,001	0.397917	<0,001	0.342361	<0,001	0.428472	<0,001
sCD163	-0.124	0.285417	0.263889	<0,001	0.456944	<0,001			0.415972	<0,001	0.538889	<0,001	0.422222	<0,001	0.401389	<0,001	0.045	0.549306	0.263194	<0,001	0.286806	<0,001	0.252778	0.062	0.470139	<0,001	0.168056	0.077	0.379167	<0,001	0.502778	<0,001	0.490972	<0,001	0.51875	<0,001
Chitinase 3-like 1	0.032	0.578472	0.263194	<0,001	0.255556	0.006	0.415972	<0,001			0.417361	<0,001	0.401389	<0,001	0.38125	<0,001	0.115278	0.225694	0.244444	0.009	0.222222	0.019	0.263889	0.05	0.296528	<0,001	0.193056	0.042	0.409028	<0,001	0.4	<0,001	0.421528	<0,001	0.274306	<0,001
gp 130/sIL-6Rb	-0.16	0.2	0.269444	<0,001	0.38125	<0,001	0.538889	<0,001	0.417361	<0,001			0.353472	<0,001	0.489583	<0,001	0.145139	0.148611	0.301389	<0,001	0.283333	<0,001	0.438194	<0,001	0.397222	<0,001	0.276389	<0,001	0.490972	<0,001	0.54375	<0,001	0.520139	<0,001	0.538194	<0,001
IFNb	-0.167	0.275	0.2875	0.018	0.269444	0.028	0.422222	<0,001	0.401389	<0,001	0.353472	<0,001			0.276389	0.024	0.323611	0.016	0.239583	0.053	0.320833	0.008	0.347222	0.025	0.280556	0.022	0.179167	0.10625	0.285417	<0,001	0.25625	<0,001	0.324306	0.012	0.252083	0.041
sIL-6Ra	-0.046	0.527778	0.29375	<0,001	0.304861	<0,001	0.401389	<0,001	0.38125	<0,001	0.489583	<0,001	0.276389	0.024			0.037	0.573611	0.171528	0.072	0.125	0.136111	0.322222	0.015	0.29375	<0,001	0.377778	<0,001	0.429861	<0,001	0.443056	<0,001	0.452778	<0,001	0.364583	<0,001
IL-11	0.052	0.549306	0.049	0.536806	0.058	0.510417	0.045	0.549306	0.115278	0.225694	0.145139	0.148611	0.323611	0.016	0.037	0.573611			0.306944	0.006	0.509028	<0,001	0.323611	0.025	0.348611	<0,001	0.087	0.422222	0.222222	0.104167	0.220833	0.055	0.43125	<0,001	0.063	0.492361
IL-19	-0.068	0.452778	0.202778	0.032	0.136111	0.107639	0.263194	<0,001	0.244444	0.009	0.301389	<0,001	0.239583	0.053	0.171528	0.072	0.306944	0.006			0.317361	<0,001	0.4125	<0,001	0.35	<0,001	0.087	0.370139	0.349306	<0,001	0.219444	<0,001	0.353472	<0,001	0.330556	<0,001
IL-20	0.151389	0.104167	0.192361	0.045	0.210417	0.028	0.286806	<0,001	0.222222	0.019	0.283333	<0,001	0.320833	0.008	0.125	0.136111	0.509028	<0,001	0.317361	<0,001			0.251389	0.064	0.490278	<0,001	-0.058	0.472917	0.304167	<0,001	0.434028	<0,001	0.475	<0,001	0.125	0.136806
IL-26	-0.228	0.23125	0.087	0.463194	0.286111	0.033	0.252778	0.062	0.263889	0.05	0.438194	<0,001	0.347222	0.025	0.322222	0.015	0.323611	0.025	0.4125	<0,001	0.251389	0.064			0.316667	0.017	0.325694	0.014	0.440972	<0,001	0.254861	0.059	0.531944	<0,001	0.426389	<0,001
IL-35	0.142361	0.119444	0.29375	<0,001	0.322222	<0,001	0.470139	<0,001	0.296528	<0,001	0.397222	<0,001	0.280556	0.022	0.29375	<0,001	0.348611	<0,001	0.35	<0,001	0.490278	<0,001	0.316667	0.017			0.106944	0.184722	0.334028	<0,001	0.450694	<0,001	0.53125	<0,001	0.386806	<0,001
Pentraxin-3	-0.054	0.5	0.28125	<0,001	0.175	0.066	0.168056	0.077	0.193056	0.042	0.276389	<0,001	0.179167	0.10625	0.377778	<0,001	0.087	0.422222	0.087	0.370139	-0.058	0.472917	0.325694	0.014	0.106944	0.184722			0.358333	<0,001	0.18125	0.056	0.177083	0.087	0.269444	<0,001
sTNF-R1	0.052	0.509028	0.349306	<0,001	0.370833	<0,001	0.379167	<0,001	0.409028	<0,001	0.490972	<0,001	0.285417	0.019	0.429861	<0,001	0.222222	0.104167	0.349306	<0,001	0.304167	<0,001	0.440972	<0,001	0.334028	<0,001	0.358333	<0,001			0.507639	<0,001	0.513194	<0,001	0.410417	<0,001
sTNF-R2	0.04	0.549306	0.306944	<0,001	0.397917	<0,001	0.502778	<0,001	0.4	<0,001	0.54375	<0,001	0.25625	0.038	0.443056	<0,001	0.220833	0.055	0.219444	0.02	0.434028	<0,001	0.254861	0.059	0.450694	<0,001	0.18125	0.056	0.507639	<0,001			0.536111	<0,001	0.413889	<0,001
TSLP	0.0868056	0.311111	0.2125	0.038	0.342361	<0,001	0.490972	<0,001	0.421528	<0,001	0.520139	<0,001	0.324306	0.012	0.452778	<0,001	0.43125	<0,001	0.353472	<0,001	0.475	<0,001	0.531944	<0,001	0.53125	<0,001	0.177083	0.087	0.513194	<0,001	0.536111	<0,001			0.431944	<0,001
TWEAK/TNFSF-12	-0.316	0.033	0.204861	0.03	0.428472	<0,001	0.51875	<0,001	0.274306	<0,001	0.538194	<0,001	0.252083	0.041	0.364583	<0,001	0.063	0.492361	0.330556	<0,001	0.125	0.136806	0.426389	<0,001	0.386806	<0,001	0.269444	<0,001	0.410417	<0,001	0.413889	<0,001	0.431944	<0,001
