# Supplementary material for: Cytokine Signatures in Mucocutaneous and Ocular Behçet’s Disease
Source: Front Immunol. 2017 Feb 27;8:200. doi: 10.3389/fimmu.2017.00200 (PMC5327443; doi:10.3389/fimmu.2017.00200)
Supplement: Supplementary file 2 [file Table_2.XLSX]

## Sheet: Supplementary Table 2
Supplementary Table 2. Correlation coefficients among serum cytokines analysed in inactive- and active- BD patients. Correlations analysis were performed using Spearman’s correlation (two-tailed p-value) as well as Pearson’s correlation test when required. Significant correlation (p value <0,05) were reported in bold. Abbrevation: BD, Behçet’s disease.
Inactive-BD	APRIL/ TNFS13		BAFF/TNFSF 13B		sCD30/TNFRSF8		sCD163		Chitinase 3-like 1		gp 130/sIL-6Rb		IFNb		sIL-6Ra		IL-11		IL-19		IL-20		IL-26		IL-35		Pentraxin-3		sTNF-R1		sTNF-R2		TSLP		TWEAK/TNFSF-12
	r	p	r	p	r	p	r	p	r	p	r	p	r	p	r	p	r	p	r	p	r	p	r	p	r	p	r	p	r	p	r	p	r	p	r	p
APRIL/TNFS13			-0.112	0.45625	-0.082	0.519444	-0.269	0.194444	0.211111	0.152083	-0.412	0.09	-0.13	0.470833	-0.129	0.423611	0.325694	0.141667	-0.328	0.127083	0.220139	0.148611	-0.393	0.275	0.0756944	0.4625	-0.123	0.435417	0.0868056	0.431944	-0.137	0.407639	0.0979167	0.418056	-0.445	0.064
BAFF/TNFSF 13B	-0.112	0.45625			0.161111	0.198611	0.193056	0.138889	0.233333	0.08125	0.225	0.0909722	0.454167	0.013	0.315278	0.03	0.265972	0.122222	0.2625	0.076	0.304861	0.041	0.163889	0.336806	0.332639	0.021	0.372222	0.008	0.403472	0.004	0.343056	0.017	0.11875	0.326389	0.0805556	0.415972
sCD30/TNFRSF8	-0.082	0.519444	0.161111	0.198611			0.534028	<0,001	0.13125	0.269444	0.376389	0.007	0.333333	0.084	0.402083	0.004	0.111806	0.403472	0.0944444	0.371528	0.225694	0.0972222	0.334722	0.0958333	0.524306	<0,001	0.279167	0.057	0.254167	0.086	0.377083	0.007	0.392361	0.009	0.460417	<0,001
sCD163	-0.269	0.194444	0.193056	0.138889	0.534028	<0,001			0.227083	0.0888889	0.481944	<0,001	0.516667	0.003	0.419444	0.002	0.258333	0.131944	0.128472	0.275694	0.280556	0.062	0.208333	0.257639	0.480556	<0,001	0.159028	0.203472	0.288194	0.049	0.479167	<0,001	0.428472	0.004	0.435417	0.001
Chitinase 3-like 1	0.211111	0.152083	0.233333	0.08125	0.13125	0.269444	0.227083	0.0888889			0.263889	0.073	0.051	0.6	0.378472	0.007	0.314583	0.0729167	0.109028	0.329167	0.340278	0.021	0.091	0.552778	0.307639	0.034	0.200694	0.126389	0.388889	0.005	0.394444	0.005	0.34375	0.027	0.027	0.627778
gp 130/sIL-6Rb	-0.412	0.09	0.225	0.0909722	0.376389	0.007	0.481944	<0,001	0.263889	0.073			0.408333	0.03	0.445833	<0,001	0.236806	0.160417	0.295139	0.043	0.167361	0.19375	0.536806	0.007	0.43125	0.002	0.383333	0.006	0.403472	0.004	0.497222	<0,001	0.409028	0.006	0.570139	<0,001
IFNb	-0.13	0.470833	0.454167	0.013	0.333333	0.084	0.516667	0.003	0.051	0.6	0.408333	0.03			0.169444	0.275694	0.459028	0.043	0.170833	0.272917	0.55	0.001	0.3125	0.219444	0.484028	0.007	0.236806	0.160417	0.322917	0.096	0.36875	0.053	0.347917	0.083	0.3	0.0861111
sIL-6Ra	-0.129	0.423611	0.315278	0.03	0.402083	0.004	0.419444	0.002	0.378472	0.007	0.445833	<0,001	0.169444	0.275694			0.192361	0.232639	0.251389	0.089	0.26875	0.075	0.353472	0.0791667	0.486806	<0,001	0.373611	0.008	0.372222	0.008	0.476389	<0,001	0.4625	0.001	0.31875	0.027
IL-11	0.325694	0.141667	0.265972	0.122222	0.111806	0.403472	0.258333	0.131944	0.314583	0.0729167	0.236806	0.160417	0.459028	0.043	0.192361	0.232639			0.290278	0.14375	0.650694	<0,001	0.428472	0.086	0.574306	<0,001	0.252083	0.139583	0.461111	0.027	0.404861	0.031	0.468056	0.017	0.127083	0.367361
IL-19	-0.328	0.127083	0.2625	0.076	0.0944444	0.371528	0.128472	0.275694	0.109028	0.329167	0.295139	0.043	0.170833	0.272917	0.251389	0.089	0.290278	0.14375			0.238194	0.0777778	0.498611	0.016	0.327083	0.023	0.102083	0.348611	0.352083	0.011	0.239583	0.0743056	0.247917	0.067	0.301389	0.038
IL-20	0.220139	0.148611	0.304861	0.041	0.225694	0.0972222	0.280556	0.062	0.340278	0.021	0.167361	0.19375	0.55	0.001	0.26875	0.075	0.650694	<0,001	0.238194	0.0777778			0.386806	0.079	0.497917	<0,001	0.248611	0.0708333	0.492361	0.002	0.457639	<0,001	0.426389	<0,001	0.0791667	0.427083
IL-26	-0.393	0.275	0.163889	0.336806	0.334722	0.0958333	0.208333	0.257639	0.091	0.552778	0.536806	0.007	0.3125	0.219444	0.353472	0.0791667	0.428472	0.041	0.498611	0.154167	0.386806	0.017			0.536806	0.007	0.467361	0.028	0.536806	0.007	0.467361	0.028	0.500694	0.023	0.517361	0.011
IL-35	0.0756944	0.4625	0.332639	0.021	0.524306	<0,001	0.480556	<0,001	0.307639	0.034	0.43125	0.002	0.484028	0.007	0.486806	<0,001	0.574306	<0,001	0.327083	0.023	0.497917	<0,001	0.536806	0.007			0.402778	0.004	0.481944	<0,001	0.478472	<0,001	0.514583	<0,001	0.413194	0.003
Pentraxin-3	-0.123	0.435417	0.372222	0.008	0.279167	0.057	0.159028	0.203472	0.200694	0.126389	0.383333	0.006	0.236806	0.160417	0.373611	0.008	0.252083	0.139583	0.102083	0.348611	0.248611	0.0708333	0.467361	0.028	0.402778	0.004			0.370139	0.009	0.35	0.014	0.217361	0.124306	0.313194	0.031
sTNF-R1	0.0868056	0.431944	0.403472	0.004	0.254167	0.086	0.288194	0.049	0.388889	0.005	0.403472	0.004	0.322917	0.096	0.372222	0.008	0.461111	0.027	0.352083	0.011	0.492361	0.002	0.536806	0.007	0.481944	<0,001	0.370139	0.009			0.609028	<0,001	0.3875	<0,001	0.30625	0.035
sTNF-R2	-0.137	0.407639	0.343056	0.017	0.377083	0.007	0.479167	<0,001	0.394444	0.005	0.497222	<0,001	0.36875	0.053	0.476389	<0,001	0.404861	0.031	0.239583	0.0743056	0.457639	<0,001	0.467361	0.028	0.478472	<0,001	0.35	0.014	0.609028	<0,001			0.455556	0.002	0.363194	0.01
TSLP	0.0979167	0.418056	0.11875	0.326389	0.392361	0.009	0.428472	0.004	0.34375	0.027	0.409028	0.006	0.347917	0.083	0.4625	0.001	0.468056	0.017	0.247917	0.067	0.426389	<0,001	0.500694	0.023	0.514583	<0,001	0.217361	0.124306	0.3875	<0,001	0.455556	0.002			0.352778	0.022
TWEAK/TNFSF-12	-0.445	0.064	0.0805556	0.415972	0.460417	<0,001	0.435417	0.001	0.027	0.627778	0.570139	<0,001	0.3	0.0861111	0.31875	0.027	0.127083	0.367361	0.301389	0.038	0.0791667	0.427083	0.517361	0.011	0.413194	0.003	0.313194	0.031	0.30625	0.035	0.363194	0.01	0.352778	0.022
Active-BD	APRIL/TNFS13		BAFF/ TNFSF 13B		sCD30/TNFRSF8		sCD163		Chitinase 3-like 1		gp 130/sIL-6Rb		IFNb		sIL-6Ra		IL-11		IL-19		IL-20		IL-26		IL-35		Pentraxin-3		sTNF-R1		sTNF-R2		TSLP		TWEAK/TNFSF-12
	r	p	r	p	r	p	r	p	r	p	r	p	r	p	r	p	r	p	r	p	r	p	r	p	r	p	r	p	r	p	r	p	r	p	r	p
APRIL/TNFS13			0.009	0.669444	-0.089	0.445139	-0.071	0.492361	-0.137	0.327083	-0.04	0.578472	-0.313	0.143056	-0.046	0.563194	-0.165	0.0847222	0.0708333	0.579861	0.186806	0.554861	-0.094	0.522917	0.116667	0.261111	-0.055	0.535417	0.0763889	0.390278	0.027	0.615278	0.161111	0.191667	-0.228	0.156944
BAFF/TNFSF 13B	0.009	0.669444			0.150694	0.156944	0.34375	0.003	0.252083	0.038	0.317361	0.008	0.181944	0.184028	0.315972	0.008	-0.102	0.513889	0.202778	0.280556	0.134028	0.197917	0.062	0.569444	0.31875	0.007	0.261806	0.03	0.298611	0.012	0.333333	0.005	0.2875	0.032	0.354861	0.002
sCD30/TNFRSF8	-0.089	0.445139	0.150694	0.156944			0.448611	<0,001	0.314583	0.008	0.434028	<0,001	0.281944	0.075	0.304167	0.011	0.098	0.235417	0.222222	0.088	0.154167	0.132639	0.320139	0.074	0.236806	0.052	0.13125	0.202778	0.400694	<0,001	0.421528	<0,001	0.34375	0.009	0.451389	<0,001
sCD163	-0.071	0.492361	0.34375	0.003	0.448611	<0,001			0.497917	<0,001	0.583333	<0,001	0.446528	0.002	0.430556	<0,001	0.022	0.132639	0.397917	<0,001	0.234722	0.132639	0.317361	0.077	0.494444	<0,001	0.186111	0.0916667	0.389583	<0,001	0.503472	<0,001	0.518056	<0,001	0.584722	<0,001
Chitinase 3-like 1	-0.137	0.327083	0.252083	0.038	0.314583	0.008	0.497917	<0,001			0.425	<0,001	0.528472	<0,001	0.343056	0.003	-0.007	0.244444	0.279861	0.005	0.129861	0.4625	0.41875	0.015	0.252778	0.037	0.158333	0.140972	0.290972	0.015	0.341667	0.004	0.442361	<0,001	0.380556	<0,001
gp 130/sIL-6Rb	-0.04	0.578472	0.317361	0.008	0.434028	<0,001	0.583333	<0,001	0.425	<0,001			0.388889	0.01	0.522222	<0,001	0.13125	0.0701389	0.347917	0.001	0.320139	0.0847222	0.325694	0.069	0.438194	<0,001	0.244444	0.045	0.452778	<0,001	0.56875	<0,001	0.609028	<0,001	0.522222	<0,001
IFNb	-0.313	0.143056	0.181944	0.184028	0.281944	0.075	0.446528	0.002	0.528472	<0,001	0.388889	0.01			0.392361	0.01	0.297222	0.019	0.295833	0.003	0.182639	0.368056	0.407639	0.038	0.206944	0.139583	0.184722	0.179167	0.300694	0.057	0.2875	0.069	0.38125	0.029	0.279861	0.078
sIL-6Ra	-0.046	0.563194	0.315972	0.008	0.304167	0.011	0.430556	<0,001	0.343056	0.003	0.522222	<0,001	0.392361	0.01			-0.013	0.661806	0.138889	0.2375	0.068	0.565278	0.272222	0.0923611	0.229861	0.06	0.393056	<0,001	0.440278	<0,001	0.427083	<0,001	0.475694	<0,001	0.421528	<0,001
IL-11	-0.165	0.322222	-0.102	0.435417	0.098	0.444444	0.022	0.6375	-0.007	0.677083	0.13125	0.254167	0.297222	0.077	-0.013	0.659722			0.365972	0.007	0.467361	<0,001	0.177778	0.259722	0.226389	0.0777778	0.003	0.685417	0.186806	0.5125	0.209722	0.0993056	0.422222	0.045	0.012	0.663889
IL-19	0.0708333	0.411806	0.202778	0.099	0.222222	0.069	0.397917	<0,001	0.279861	0.02	0.347917	0.003	0.295833	0.061	0.138889	0.184722	0.365972	0.007			0.251389	0.039	0.369444	0.036	0.385417	<0,001	0.054	0.53125	0.338889	0.081	0.283333	0.019	0.418056	0.011	0.349306	0.003
IL-20	0.186806	0.104167	0.134028	0.196528	0.154167	0.149306	0.234722	0.054	0.129861	0.205556	0.320139	0.007	0.182639	0.182639	0.068	0.491667	0.467361	<0,001	0.251389	0.039			-0.024	0.640278	0.429861	<0,001	-0.306	0.083	0.211111	0.0777778	0.429167	<0,001	0.411111	<0,001	0.104861	0.279861
IL-26	-0.094	0.522917	0.062	0.569444	0.320139	0.074	0.317361	0.077	0.41875	0.015	0.325694	0.069	0.407639	0.038	0.272222	0.0923611	0.177778	0.05	0.369444	0.004	-0.024	0.586806			0.0993056	0.411806	0.302778	0.092	0.354167	0.046	0.028	0.638194	0.465972	0.007	0.356944	0.043
IL-35	0.116667	0.261111	0.31875	0.007	0.236806	0.052	0.494444	<0,001	0.252778	0.037	0.438194	<0,001	0.206944	0.139583	0.229861	0.06	0.226389	0.075	0.385417	0.017	0.429861	0.002	0.0993056	0.411806			-0.019	0.635417	0.226389	0.064	0.45	<0,001	0.522917	<0,001	0.411806	<0,001
Pentraxin-3	-0.055	0.535417	0.261806	0.03	0.13125	0.202778	0.186111	0.0916667	0.158333	0.140972	0.244444	0.045	0.184722	0.179167	0.393056	<0,001	0.003	0.657639	0.054	0.186806	-0.306	0.14375	0.302778	0.092	-0.019	0.635417			0.3625	0.002	0.09	0.429861	0.160417	0.170139	0.222917	0.068
sTNF-R1	0.0763889	0.390278	0.298611	0.012	0.400694	<0,001	0.389583	<0,001	0.290972	0.015	0.452778	<0,001	0.300694	0.057	0.440278	<0,001	0.186806	0.134028	0.338889	0.004	0.211111	0.085	0.354167	0.046	0.226389	0.064	0.3625	0.002			0.395139	<0,001	0.534028	<0,001	0.430556	<0,001
sTNF-R2	0.027	0.615278	0.333333	0.005	0.421528	<0,001	0.503472	<0,001	0.341667	0.004	0.56875	<0,001	0.2875	0.069	0.427083	<0,001	0.209722	0.018	0.283333	0.595833	0.429167	<0,001	0.028	0.638194	0.45	<0,001	0.09	0.429861	0.395139	<0,001			0.576389	<0,001	0.441667	<0,001
TSLP	0.161111	0.191667	0.2875	0.032	0.34375	0.009	0.518056	<0,001	0.442361	<0,001	0.609028	<0,001	0.38125	0.029	0.475694	<0,001	0.422222	0.003	0.418056	<0,001	0.411111	0.001	0.465972	0.007	0.522917	<0,001	0.160417	0.170139	0.534028	<0,001	0.576389	<0,001			0.472917	<0,001
TWEAK/TNFSF-12	-0.228	0.156944	0.354861	0.002	0.451389	<0,001	0.584722	<0,001	0.380556	<0,001	0.522222	<0,001	0.279861	0.078	0.421528	<0,001	0.012	0.0736111	0.349306	<0,001	0.104861	0.254861	0.356944	0.043	0.411806	<0,001	0.222917	0.068	0.430556	<0,001	0.441667	<0,001	0.472917	<0,001
