# Supplementary material for: Cytokine Signatures in Mucocutaneous and Ocular Behçet’s Disease
Source: Front Immunol. 2017 Feb 27;8:200. doi: 10.3389/fimmu.2017.00200 (PMC5327443; doi:10.3389/fimmu.2017.00200)
Supplement: Supplementary file 3 [file Table_3.XLSX]

## Sheet: Supplementary Table 3
Supplementary Table 3. Correlation coefficients among serum cytokines analysed in mucocutenous patients with (MO-BD) or without (M-BD) ocular involvement . Correlations analysis were performed using Spearman’s correlation (two-tailed p-value) as well as Pearson’s correlation test when required. Significant correlation (p value <0.05) were reported in bold. Abbrevation: BD. Behçet’s disease; M-BD.…
M-BD	APRIL/TNFS13		BAFF/TNFSF 13B		sCD30/TNFRSF8		sCD163		Chitinase 3-like 1		gp 130/sIL-6Rb		IFNb		sIL-6Ra		IL-11		IL-19		IL-20		IL-26		IL-35		Pentraxin-3		sTNF-R1		sTNF-R2		TSLP		TWEAK/TNFSF-12
	r	p	r	p	r	p	r	p	r	p	r	p	r	p	r	p	r	p	r	p	r	p	r	p	r	p	r	p	r	p	r	p	r	p	r	p
APRIL/TNFS13			0.009	0.666667	0.011	0.6625	-0.033	0.594444	0.195833	0.0819444	-0.112	0.375694	-0.043	0.6	0.059	0.519444	-0.064	0.551389	-0.071	0.485417	0.122917	0.23125	-0.014	0.666667	0.125	0.225694	0.033	0.595833	0.194444	0.0840278	0.0763889	0.38125	0.163889	0.151389	-0.276	0.0881944
BAFF/TNFSF 13B	0.009	0.666667			0.101389	0.280556	0.273611	0.019	0.198611	0.096	0.330556	0.004	0.390972	0.012	0.2875	0.013	0.039	0.599306	0.261806	0.026	0.152778	0.141667	0.01	0.674306	0.275694	0.018	0.326389	0.004	0.365972	<0,001	0.321528	0.005	0.198611	0.0777778	0.25625	0.029
sCD30/TNFRSF8	0.011	0.6625	0.101389	0.280556			0.386806	<0,001	0.140278	0.169444	0.254861	0.03	0.240972	0.100694	0.242361	0.04	-0.282	0.141667	0.0770833	0.365972	0.104861	0.268056	0.038	0.616667	0.240972	0.041	0.131944	0.190972	0.283333	0.015	0.320139	0.005	0.270139	0.028	0.402083	<0,001
sCD163	-0.033	0.594444	0.273611	0.019	0.386806	<0,001			0.333333	0.004	0.485417	<0,001	0.361806	0.022	0.341667	0.003	-0.116	0.422222	0.3125	0.007	0.260417	0.026	0.0736111	0.48125	0.494444	<0,001	0.068	0.486111	0.230556	0.051	0.466667	<0,001	0.472222	<0,001	0.508333	<0,001
Chitinase 3-like 1	0.195833	0.0819444	0.198611	0.096	0.140278	0.169444	0.333333	0.004			0.394444	<0,001	0.233333	0.111111	0.325694	0.004	0.11875	0.309722	0.229167	0.053	0.246528	0.036	0.14375	0.304861	0.284028	0.005	0.091	0.419444	0.345139	0.005	0.378472	<0,001	0.44375	<0,001	0.177083	0.0965278
gp 130/sIL-6Rb	-0.112	0.375694	0.330556	0.004	0.254861	0.03	0.485417	<0,001	0.394444	<0,001			0.169444	0.21875	0.448611	<0,001	0.012	0.665278	0.331944	0.004	0.236806	0.045	0.190972	0.209028	0.330556	0.004	0.15	0.147917	0.379167	<0,001	0.505556	<0,001	0.4	<0,001	0.46875	<0,001
IFNb	-0.043	0.6	0.390972	0.012	0.240972	0.100694	0.361806	0.022	0.233333	0.111111	0.169444	0.21875			0.10625	0.369444	0.302778	0.0729167	0.249306	0.0909722	0.379167	0.016	0.107639	0.448611	0.339583	0.034	0.09375	0.402778	0.219444	0.130556	0.0715278	0.46875	0.147917	0.274306	0.185417	0.186111
sIL-6Ra	0.059	0.519444	0.2875	0.013	0.242361	0.04	0.341667	0.003	0.325694	0.004	0.448611	<0,001	0.10625	0.369444			-0.179	0.296528	0.217361	0.067	0.092	0.415972	0.130556	0.336111	0.302083	0.009	0.317361	0.006	0.327083	0.004	0.36875	0.001	0.367361	0.002	0.345139	0.002
IL-11	-0.064	0.551389	0.039	0.599306	-0.282	0.141667	-0.116	0.422222	0.11875	0.309722	0.012	0.665278	0.302778	0.0729167	-0.179	0.296528			0.188194	0.154167	0.448611	0.001	0.332639	0.084	0.328472	0.04	0.046	0.583333	0.0944444	0.379861	0.048	0.577778	0.341667	0.023	-0.16	0.33125
IL-19	-0.071	0.485417	0.261806	0.026	0.0770833	0.365972	0.3125	0.007	0.229167	0.053	0.331944	0.004	0.249306	0.0909722	0.217361	0.067	0.188194	0.154167			0.269444	0.021	0.447222	0.008	0.404861	<0,001	-0.045	0.552778	0.272222	0.049	0.235417	0.046	0.321528	0.008	0.390972	<0,001
IL-20	0.122917	0.23125	0.152778	0.141667	0.104861	0.268056	0.260417	0.026	0.246528	0.036	0.236806	0.045	0.379167	0.016	0.092	0.415972	0.448611	0.001	0.269444	0.021			0.188889	0.211806	0.396528	<0,001	-0.192	0.186806	0.294444	0.011	0.417361	<0,001	0.477778	<0,001	0.068	0.485417
IL-26	-0.014	0.666667	0.01	0.674306	0.038	0.616667	0.0736111	0.48125	0.14375	0.304861	0.190972	0.209028	0.107639	0.448611	0.130556	0.336111	0.332639	0.084	0.447222	0.008	0.188889	0.211806			0.222222	0.156944	0.139583	0.314583	0.318056	0.076	0.038	0.616667	0.43125	0.015	0.152083	0.286806
IL-35	0.125	0.225694	0.275694	0.018	0.240972	0.041	0.494444	<0,001	0.284028	0.005	0.330556	0.004	0.339583	0.034	0.302083	0.009	0.328472	0.04	0.404861	<0,001	0.396528	<0,001	0.222222	0.156944			0.106944	0.261111	0.282639	0.03	0.397917	<0,001	0.509028	<0,001	0.377083	<0,001
Pentraxin-3	0.033	0.595833	0.326389	0.004	0.131944	0.190972	0.068	0.486111	0.091	0.419444	0.15	0.147917	0.09375	0.402778	0.317361	0.006	0.046	0.583333	-0.045	0.552778	-0.192	0.186806	0.139583	0.314583	0.106944	0.261111			0.299306	0.01	0.139583	0.171528	0.032	0.597917	0.225	0.058
sTNF-R1	0.194444	0.0840278	0.365972	0.001	0.283333	0.015	0.230556	0.051	0.345139	0.005	0.379167	<0,001	0.219444	0.130556	0.327083	0.004	0.0944444	0.379861	0.272222	0.049	0.294444	0.011	0.318056	0.076	0.282639	0.03	0.299306	0.01			0.476389	<0,001	0.324306	0.007	0.225694	0.057
sTNF-R2	0.0763889	0.38125	0.321528	0.005	0.320139	0.005	0.466667	<0,001	0.378472	<0,001	0.505556	<0,001	0.0715278	0.46875	0.36875	0.001	0.048	0.577778	0.235417	0.046	0.417361	<0,001	0.038	0.616667	0.397917	<0,001	0.139583	0.171528	0.476389	<0,001			0.46875	<0,001	0.347917	0.002
TSLP	0.163889	0.151389	0.198611	0.0777778	0.270139	0.028	0.472222	<0,001	0.44375	<0,001	0.4	<0,001	0.147917	0.274306	0.367361	0.002	0.341667	0.023	0.321528	0.008	0.477778	<0,001	0.43125	0.015	0.509028	<0,001	0.032	0.597917	0.324306	0.007	0.46875	<0,001			0.305556	0.012
TWEAK/TNFSF-12	-0.276	0.0881944	0.25625	0.029	0.402083	<0,001	0.508333	<0,001	0.177083	0.0965278	0.46875	<0,001	0.185417	0.186111	0.345139	0.002	-0.16	0.33125	0.390972	<0,001	0.068	0.485417	0.152083	0.286806	0.377083	<0,001	0.225	0.058	0.225694	0.057	0.347917	0.002	0.305556	0.012
MO-BD	APRIL/TNFS13		BAFF/TNFSF 13B		sCD30/TNFRSF8		sCD163		Chitinase 3-like 1		gp 130/sIL-6Rb		IFNb		sIL-6Ra		IL-11		IL-19		IL-20		IL-26		IL-35		Pentraxin-3		sTNF-R1		sTNF-R2		TSLP		TWEAK/TNFSF-12
	r	p	r	p	r	p	r	p	r	p	r	p	r	p	r	p	r	p	r	p	r	p	r	p	r	p	r	p	r	p	r	p	r	p	r	p
APRIL/TNFS13			-0.07	0.579861	-0.308	0.229861	-0.364	0.170833	-0.587	0.049	-0.655	0.021	-0.844	0.004	-0.497	0.0722222	-0.057	0.613889	-0.342	0.192361	0.15	0.347222	-0.861	0.028	0.098	0.229861	-0.322	0.213889	-0.671	0.017	0.19375	0.429861	-0.365	0.615972	-0.677	0.016
BAFF/TNFSF 13B	-0.07	0.579861			0.204167	0.174306	0.215972	0.154861	0.301389	0.083	0.229861	0.134722	0.221528	0.214583	0.468056	0.004	0.110417	0.406944	0.0715278	0.481944	0.335417	0.051	0.0972222	0.485417	0.357639	0.037	0.166667	0.244444	0.342361	0.047	0.340278	0.048	0.361111	0.071	0.0819444	0.453472
sCD30/TNFRSF8	-0.308	0.229861	0.204167	0.174306			0.59375	<0,001	0.449306	0.006	0.558333	<0,001	0.472917	0.018	0.272222	0.0840278	0.259722	0.129861	0.321528	0.063	0.399306	0.018	0.554861	0.008	0.370833	0.029	0.25	0.108333	0.454167	0.005	0.429167	0.01	0.374306	0.06	0.500694	0.002
sCD163	-0.364	0.170833	0.215972	0.154861	0.59375	<0,001			0.451389	0.006	0.652083	<0,001	0.523611	0.006	0.393056	0.02	0.111806	0.402778	0.161806	0.254861	0.336111	0.051	0.427778	0.063	0.364583	0.033	0.294444	0.091	0.532639	<0,001	0.475	0.003	0.4875	0.009	0.539583	<0,001
Chitinase 3-like 1	-0.587	0.049	0.301389	0.083	0.449306	0.006	0.451389	0.006			0.415278	0.013	0.552778	0.003	0.515972	<0,001	0.111806	0.402778	0.100694	0.402083	0.145139	0.290278	0.368056	0.0819444	0.15	0.280556	0.302778	0.082	0.45625	0.005	0.354167	0.039	0.381944	0.054	0.335417	0.052
gp 130/sIL-6Rb	-0.655	0.021	0.229861	0.134722	0.558333	<0,001	0.652083	<0,001	0.415278	0.013			0.596528	<0,001	0.401389	0.017	0.325	0.091	0.392361	0.018	0.328472	0.055	0.6	0.001	0.38125	0.022	0.335417	0.052	0.597222	<0,001	0.218056	0.152778	0.604861	<0,001	0.611806	<0,001
IFNb	-0.844	0.004	0.221528	0.214583	0.472917	0.018	0.523611	0.006	0.552778	0.003	0.596528	<0,001			0.53125	0.005	0.353472	0.0923611	0.432639	0.031	0.181944	0.284722	0.5625	0.015	0.210417	0.152083	0.350694	0.096	0.479167	0.013	0.109028	0.434722	0.575	0.006	0.522917	0.005
sIL-6Ra	-0.497	0.0722222	0.468056	0.004	0.272222	0.0840278	0.393056	0.02	0.515972	<0,001	0.401389	0.017	0.53125	0.005			0.127083	0.367361	0.056	0.577083	0.176389	0.223611	0.444444	0.051	0.115972	0.361806	0.403472	0.016	0.488194	0.002	0.370833	0.029	0.518056	0.005	0.241667	0.11875
IL-11	-0.057	0.613889	0.110417	0.406944	0.259722	0.129861	0.111806	0.402778	0.111806	0.402778	0.325	0.091	0.353472	0.0923611	0.127083	0.367361			0.461111	0.01	0.558333	<0,001	0.330556	0.161806	0.288889	0.0965278	0.0979167	0.436806	0.293056	0.0923611	0.486111	0.005	0.5	0.012	0.222917	0.181944
IL-19	-0.342	0.192361	0.0715278	0.481944	0.321528	0.063	0.161806	0.254861	0.100694	0.402083	0.392361	0.018	0.432639	0.031	0.056	0.577083	0.461111	0.01			0.285417	0.0701389	0.540278	0.008	0.134722	0.315972	0.246528	0.1125	0.413889	0.012	0.123611	0.342361	0.410417	0.033	0.390972	0.019
IL-20	0.15	0.347222	0.335417	0.051	0.399306	0.018	0.336111	0.051	0.145139	0.290278	0.328472	0.055	0.181944	0.284722	0.176389	0.223611	0.558333	<0,001	0.285417	0.0701389			0.302083	0.144444	0.509028	0.001	0.0930556	0.420833	0.329861	0.054	0.648611	<0,001	0.438194	0.021	0.18125	0.216667
IL-26	-0.861	0.028	0.0972222	0.485417	0.554861	0.008	0.427778	0.063	0.368056	0.0819444	0.6	0.001	0.5625	0.015	0.444444	0.051	0.330556	0.161806	0.540278	0.008	0.302083	0.144444			0.221528	0.256944	0.626389	<0,001	0.460417	0.037	0.154861	0.372222	0.590972	0.004	0.501389	0.018
IL-35	0.213889	0.229861	0.357639	0.037	0.370833	0.029	0.364583	0.033	0.15	0.280556	0.410417	0.014	0.265278	0.152083	0.115972	0.361806	0.298611	0.0965278	0.241667	0.315972	0.509028	<0,001	0.215972	0.256944			-0.012	0.670833	0.359028	0.033	0.41875	0.01	0.440278	0.02	0.210417	0.164583
Pentraxin-3	-0.322	0.213889	0.166667	0.244444	0.25	0.108333	0.294444	0.091	0.302778	0.082	0.335417	0.052	0.350694	0.096	0.403472	0.016	0.0979167	0.436806	0.246528	0.1125	0.0930556	0.420833	0.626389	<0,001	-0.012	0.670833			0.340278	0.048	0.088	0.511806	0.39375	0.046	0.241667	0.11875
sTNF-R1	-0.671	0.017	0.342361	0.047	0.454167	0.005	0.532639	<0,001	0.45625	0.005	0.597222	<0,001	0.479167	0.013	0.488194	0.002	0.293056	0.0923611	0.413889	0.012	0.329861	0.054	0.460417	0.037	0.359028	0.033	0.340278	0.048			0.220139	0.149306	0.521528	0.003	0.576389	<0,001
sTNF-R2	0.19375	0.263889	0.340278	0.048	0.429167	0.01	0.475	0.003	0.354167	0.039	0.218056	0.152778	0.109028	0.434722	0.370833	0.029	0.486111	0.005	0.123611	0.342361	0.648611	<0,001	0.154861	0.372222	0.41875	0.01	0.088	0.511806	0.220139	0.149306			0.321528	0.0770833	0.0916667	0.426389
TSLP	-0.365	0.23125	0.361111	0.071	0.374306	0.06	0.4875	0.009	0.381944	0.054	0.604861	<0,001	0.575	0.006	0.518056	0.005	0.5	0.012	0.410417	0.033	0.438194	0.021	0.590972	0.004	0.440278	0.02	0.39375	0.046	0.521528	0.003	0.321528	0.0770833			0.479167	0.009
TWEAK/TNFSF-12	-0.677	0.016	0.0819444	0.453472	0.500694	0.002	0.539583	<0,001	0.335417	0.052	0.611806	<0,001	0.522917	0.005	0.241667	0.11875	0.222917	0.181944	0.390972	0.019	0.18125	0.216667	0.501389	0.018	0.210417	0.164583	0.241667	0.11875	0.576389	<0,001	0.0916667	0.426389	0.479167	0.009
