# Supplementary material for: Cytokine Signatures in Mucocutaneous and Ocular Behçet’s Disease
Source: Front Immunol. 2017 Feb 27;8:200. doi: 10.3389/fimmu.2017.00200 (PMC5327443; doi:10.3389/fimmu.2017.00200)
Supplement: Supplementary file 4 [file Table_4.XLSX]

## Sheet: Supplementary Table 4
Supplementary Table 4. Linear regression analysis: disease duration (months) and serum cytokine levels (pg/mL). Abbreviations: BD, Behçet’s disease; M-BD, mucocutenous patients without ocular involvement; MO-BD, mucocutenous patients with ocular involvement. Significant p values (p < 0,05) are shown in bold.
	BD patients			Inactive-BD			Active-BD			M-BD			MO-BD
	R square	P value		R square	P value		R square	P value		R square	P value		R square	P value
APRIL/TNFS13	0.001	0.567361		< 0,001	0.660417		0.002	0.574306		0.002	0.567361		0.191667	0.079
BAFF/TNFSF 13B	0.002	0.521528		0.005	0.527778		0.002	0.552778		0.01	0.404861		0.007	0.525694
sCD30/TNFRSF8	0.007	0.385417		0.003	0.5625		0.029	0.258333		0.062	0.108333		0.270833	0.01
sCD163	< 0,001	0.609028		0.009	0.467361		0.009	0.429861		0.0861111	0.041		0.328472	0.003
Chitinase3-like1	0.01	0.3375		0.157639	0.025		0.014	0.370833		0.130556	0.011		0.190278	0.038
gp130/sIL-6Rb	0.002	0.54375		0.003	0.552083		0.012	0.392361		0.1125	0.018		0.447917	< 0,001
IFNb	0.008	0.442361		0.003	0.599306		0.014	0.454861		0.081	0.175		0.217361	0.058
sIL-6Ra	0.026	0.175		0.023	0.347222		0.025	0.279861		0.109028	0.02		0.002	0.596528
IL-11	0.002	0.554861		0.024	0.425		0.002	0.590972		0.027	0.332639		0.019	0.452778
IL-19	< 0,001	0.688194		0.007	0.497222		0.009	0.434028		0.009	0.411111		0.0819444	0.134028
IL-20	0.003	0.498611		0.006	0.511806		0.024	0.284722		< 0,001	0.655556		0.065	0.235417
IL-26	0.015	0.3875		0.113194	0.152083		0.005	0.561806		0.038	0.336806		0.228472	0.083
IL-35	< 0,001	0.682639		< 0,001	0.678472		< 0,001	0.668056		0.042	0.16875		0.104167	0.0958333
Pentraxin-3	0.007	0.3875		0.042	0.248611		< 0,001	0.688194		0.031	0.222222		0.021	0.411111
sTNF-R1	0.011	0.325694		0.001	0.629167		0.025	0.279167		0.028	0.240278		0.436111	< 0,001
sTNF-R2	0.013	0.288889		0.014	0.416667		0.014	0.370833		0.071	0.0888889		0.016	0.445139
TSLP	0.002	0.526389		0.009	0.475694		0.029	0.290278		0.015	0.354861		0.172917	0.083
TWEAK/TNFSF-12	0.004	0.45		< 0,001	0.69375		0.012	0.391667		0.0798611	0.051		0.502083	< 0,001
